# Supplementary material for: A polysulfide-functionalized separator enables robust long-cycle operation of lithium-metal batteries
Source: Royal Society of Chemistry journal article supplement (doi:10.1039/d2su00147k), 2023-01-01
Supplement: d2su00147k1.pdf [file d2su00147k1.pdf]

# The ultra-long stable lithium-metal battery assembled with polysulfide-functionalized separator

Mengqiu Yang<sup>1</sup>, Yuanpeng Ji<sup>1</sup>, Yunfa Dong<sup>2</sup>, Liwei Dong<sup>1</sup>, Yuanpeng Liu<sup>2</sup>, Caomeng Zhang<sup>2</sup>, Sue Hao<sup>1,3</sup>, Chunhui Yang<sup>1,3</sup>, Xiaoqiang Wu<sup>4</sup>, Qingquan Kong<sup>4</sup>, Jiecai Han<sup>2</sup>, Weidong He<sup>\*, 2,4,5</sup>

<sup>1</sup>MIIT Key Laboratory of Critical Materials Technology for New Energy Conversion and Storage, School of Chemistry and Chemical Engineering, Harbin Institute of Technology, Harbin 150080, China.

<sup>2</sup>National Key Laboratory of Science and Technology on Advanced Composites in Special Environments, and Center for Composite Materials and Structures, Harbin Institute of Technology, Harbin 150080, China.

<sup>3</sup>State Key Laboratory of Urban Water Resource and Environment, Harbin Institute of Technology, Harbin 150080, China.

<sup>4</sup>School of Mechanical Engineering, Chengdu University, Chengdu, 610106, China.

<sup>5</sup>Chongqing Research Institute, Harbin Institute of Technology, Chongqing 401151, China.

## Corresponding Author

\*E-mail: [weidong.he@hit.edu.cn](mailto:weidong.he@hit.edu.cn).

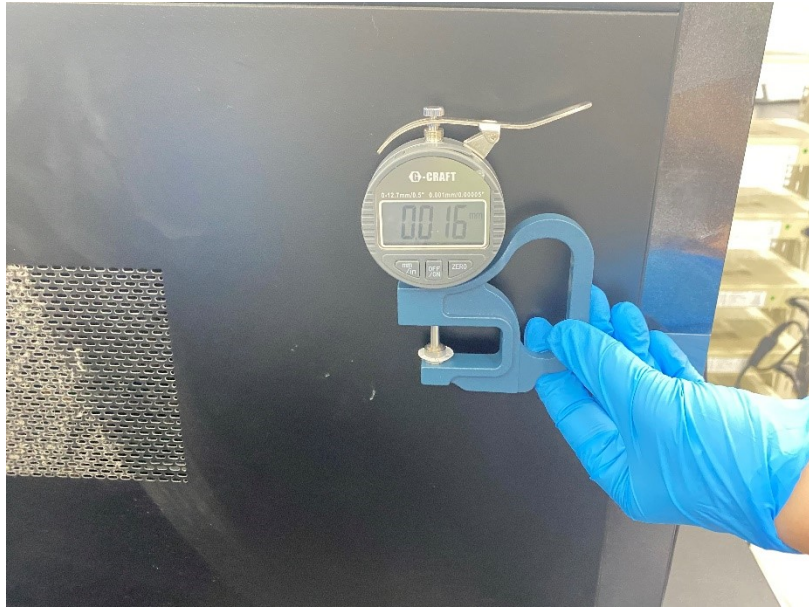

**S1.** The thickness of the PESV composite separator.

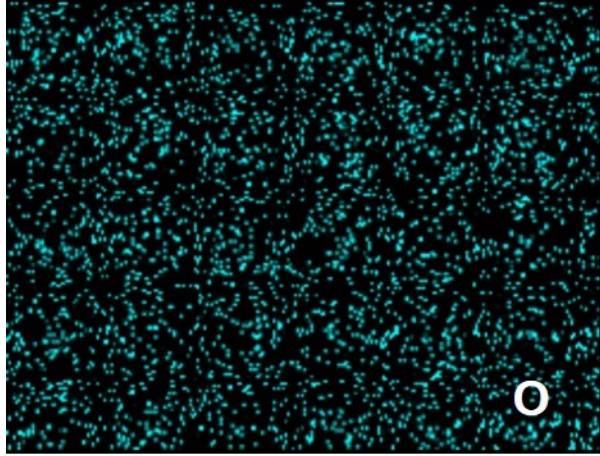

**S2.** The element mapping of O in the PESV composite separator.

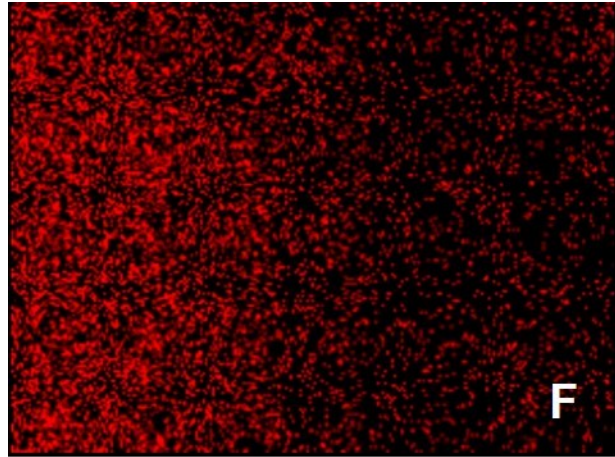

S3. The element mapping of F in the PESV composite separator.

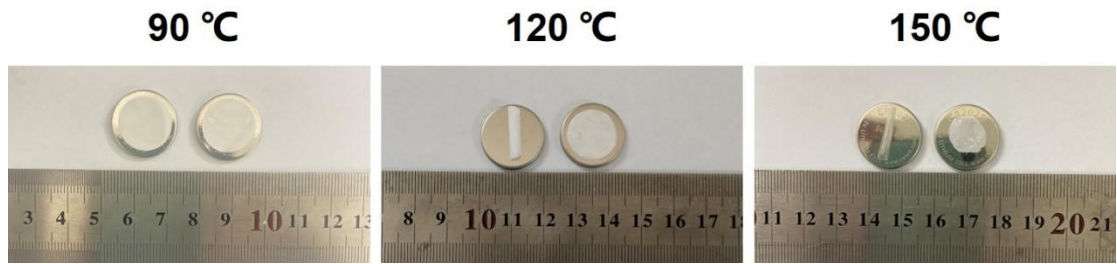

**S4.** The morphology of the PE and PESV separators at 90 °C, 120 °C and 150 °C.

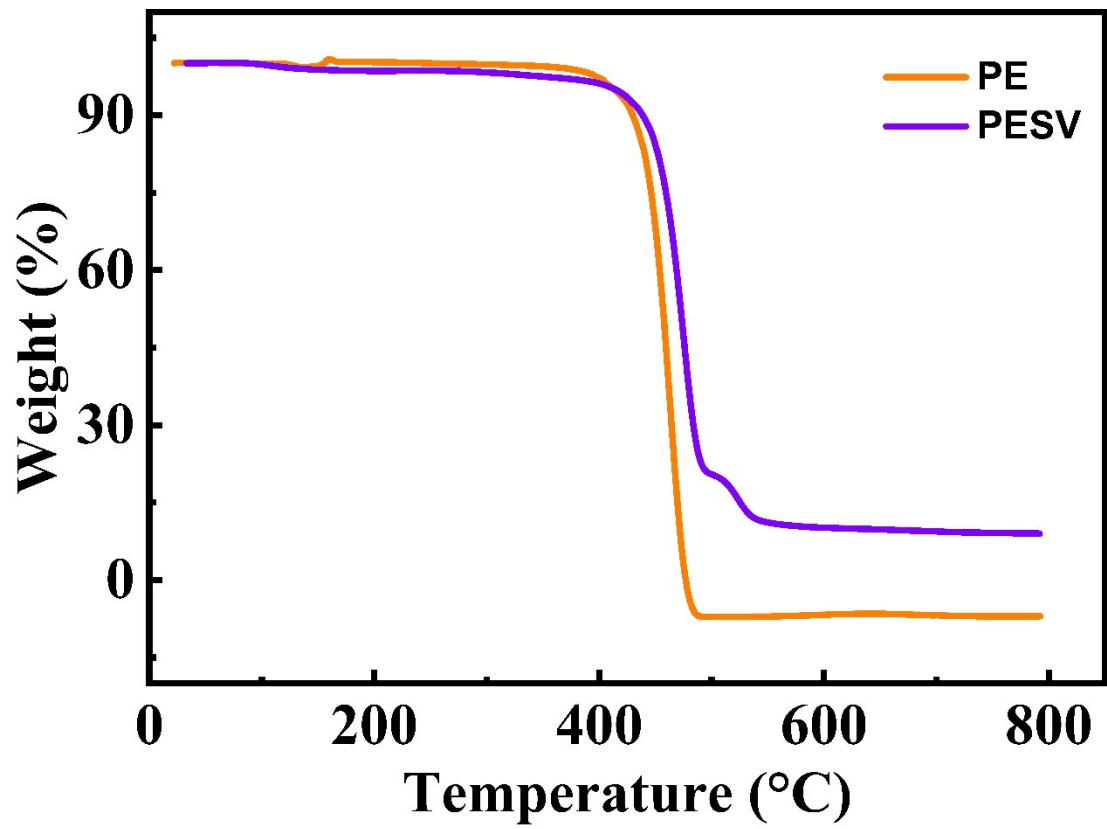

S5. The thermogravimetric analysis (TGA) of the PE and PESV separators.

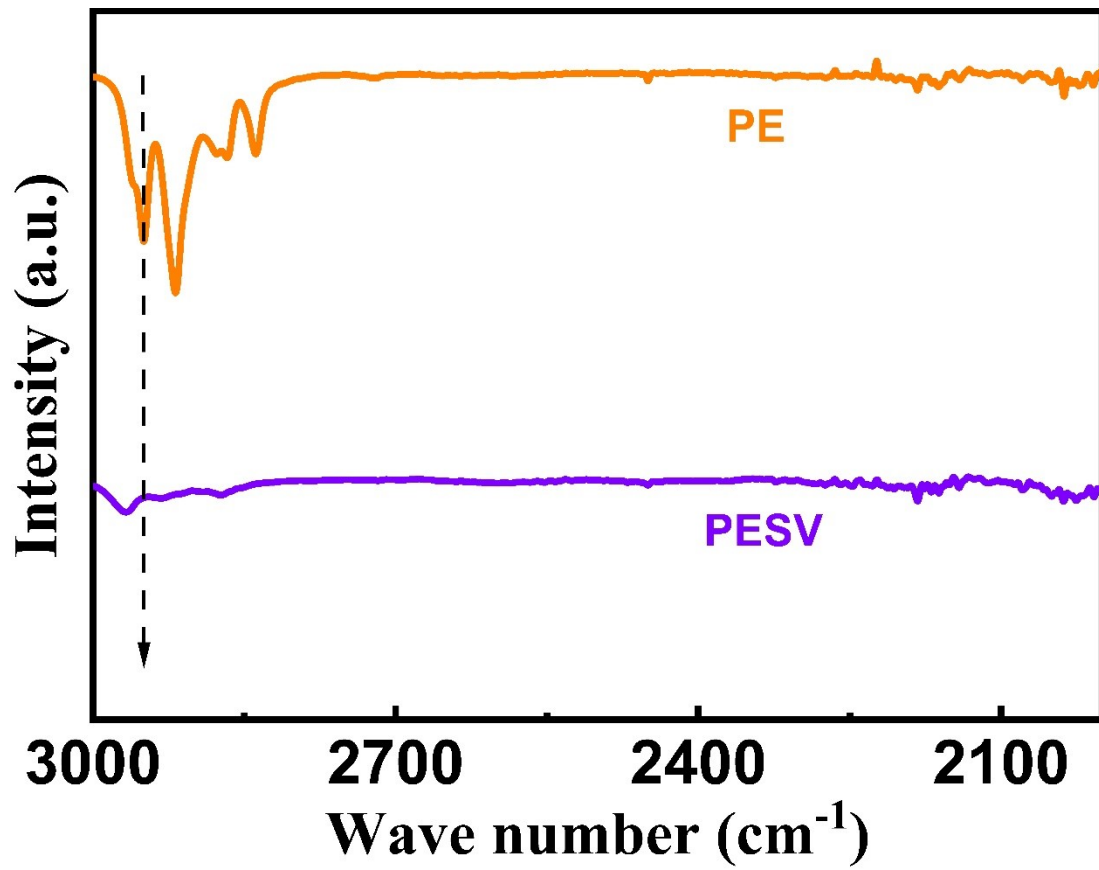

S6. The FTIR results of the PESV separator.

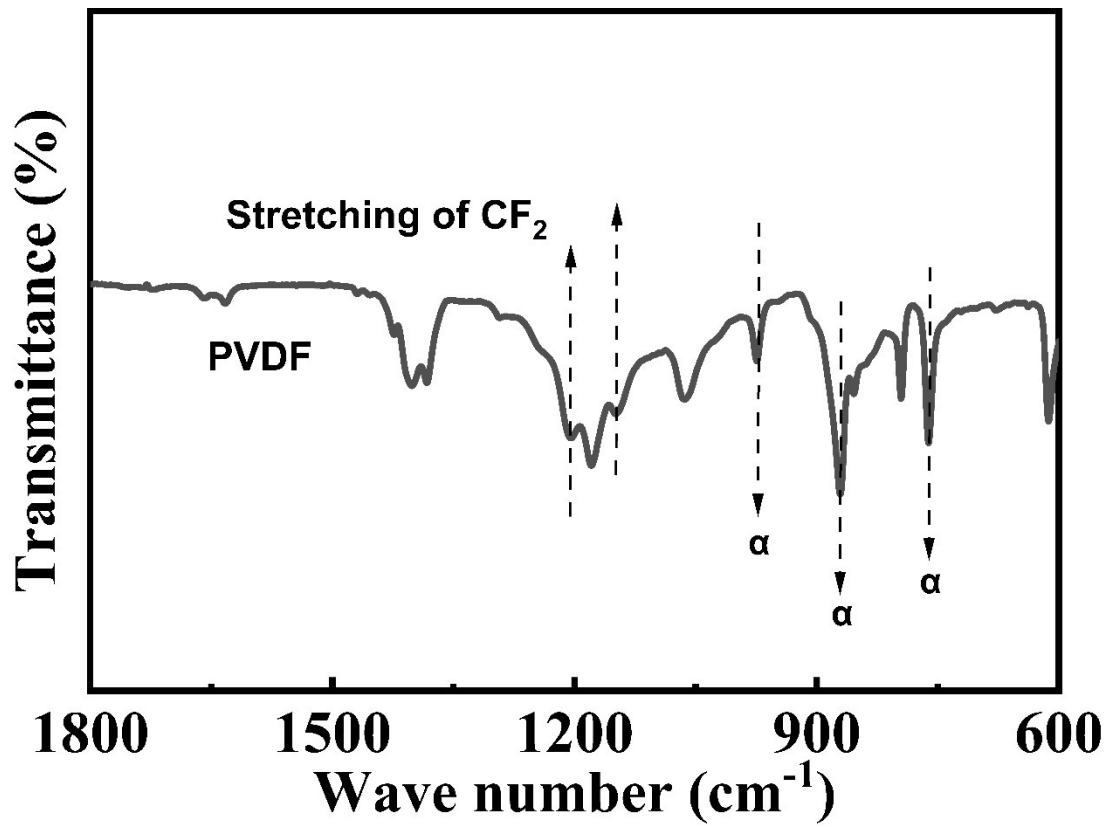

S7. The FTIR results of the PVDF.



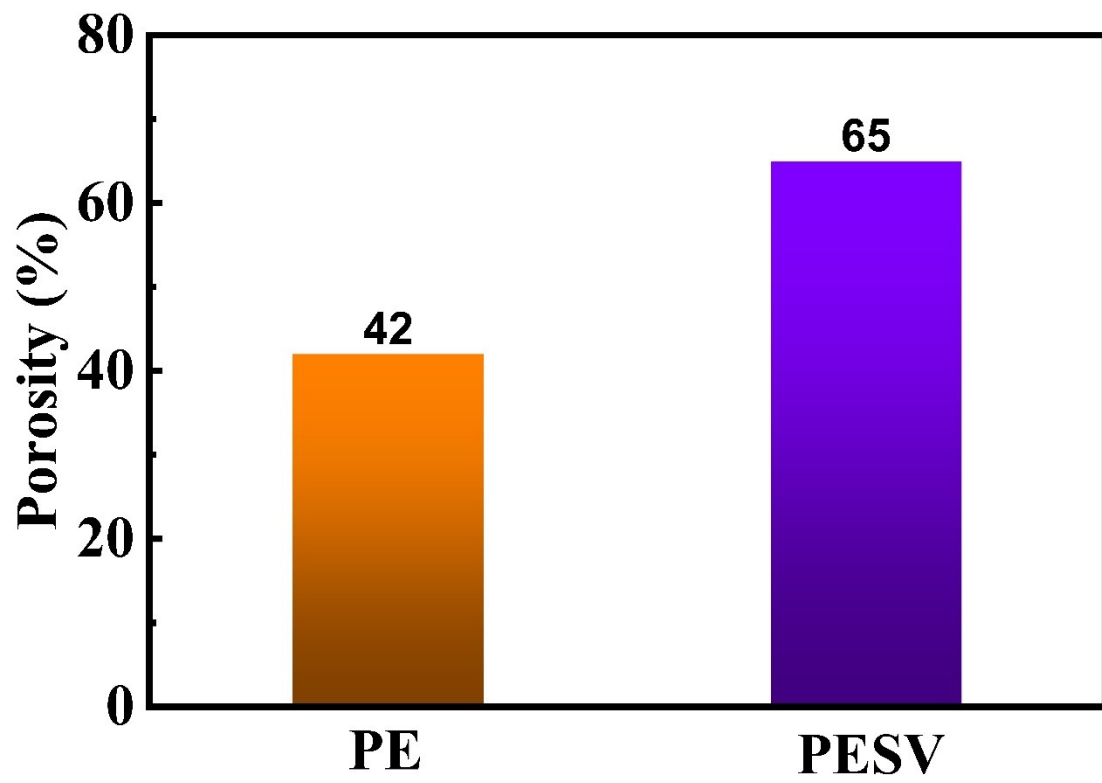

S8. The porosity of the PE and PESV separators.

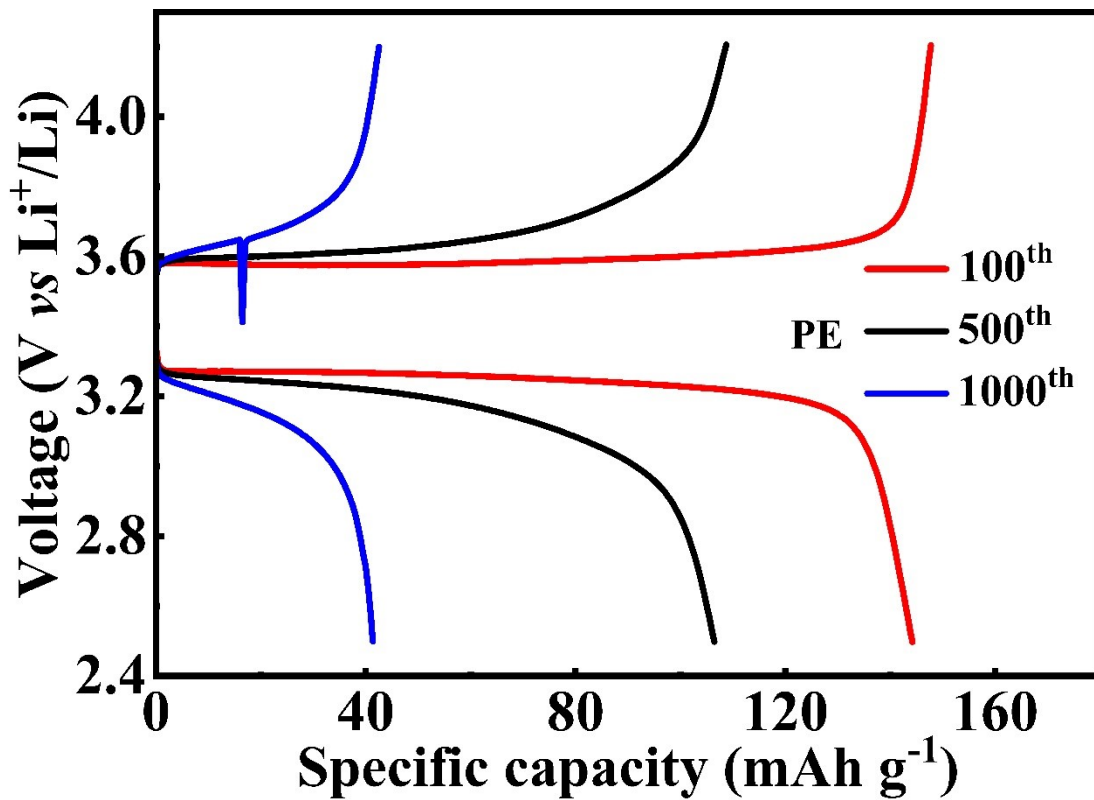

S9. Charging-discharging plot of LFP/Li batteries with PE.

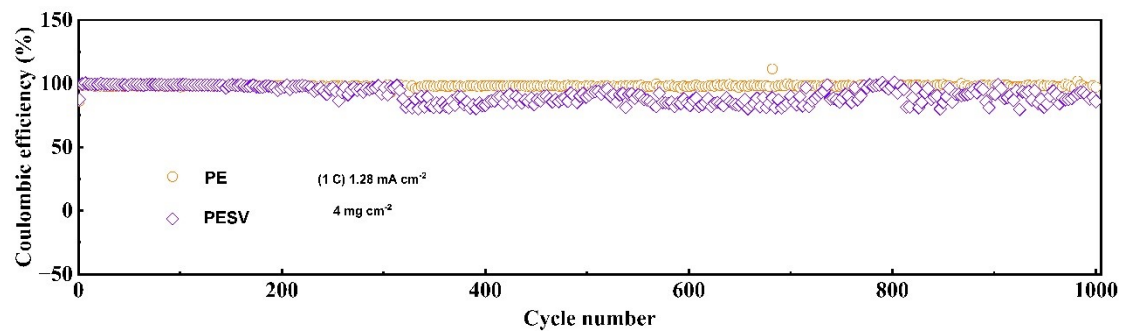

**S10.** The corresponding coulombic efficiency of cells with the PESV and PE separators at 1.28 mA cm<sup>-2</sup> with mass loading of 4 mg cm<sup>-2</sup>.

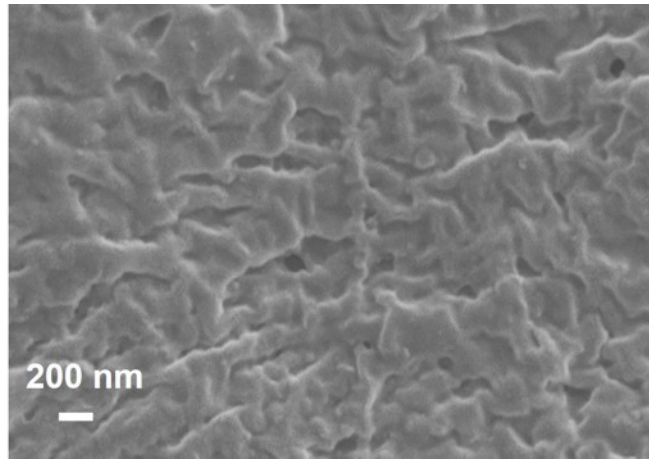

**S11.** The SEM image of the PE after 300 cycles

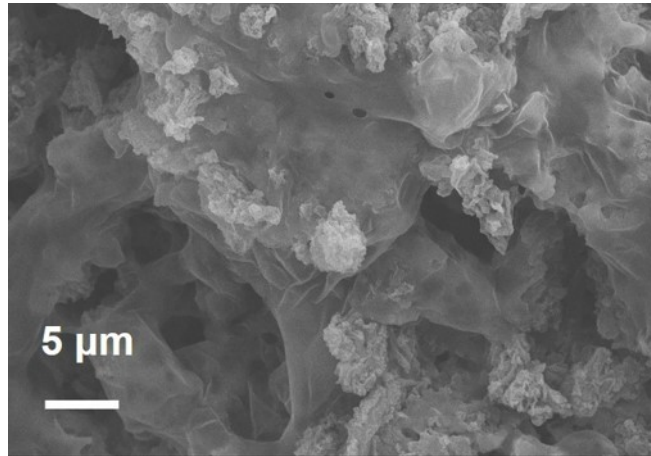

**S12.** The SEM image of lithium anode in LFP/Li with the PE after 300 cycles.

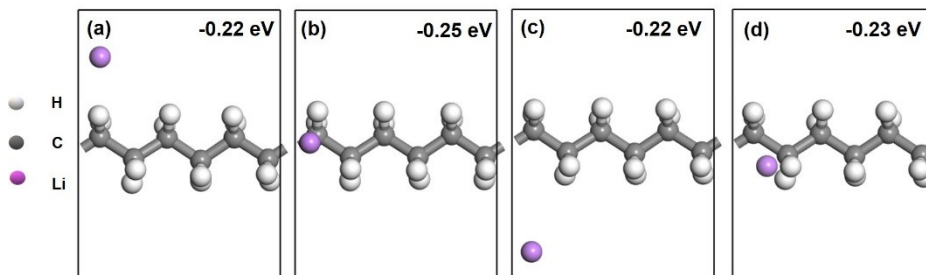

**S13.** The binding energy between PE and  $\text{Li}^+$  at different positions.
